# Supplementary material
Source: PubMed Central journal article supplement (PMC11107610)

A.

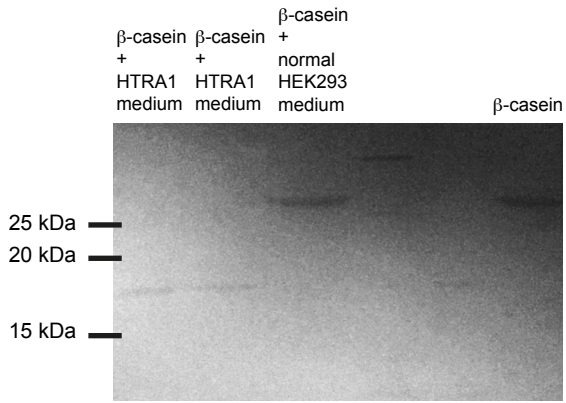

B.

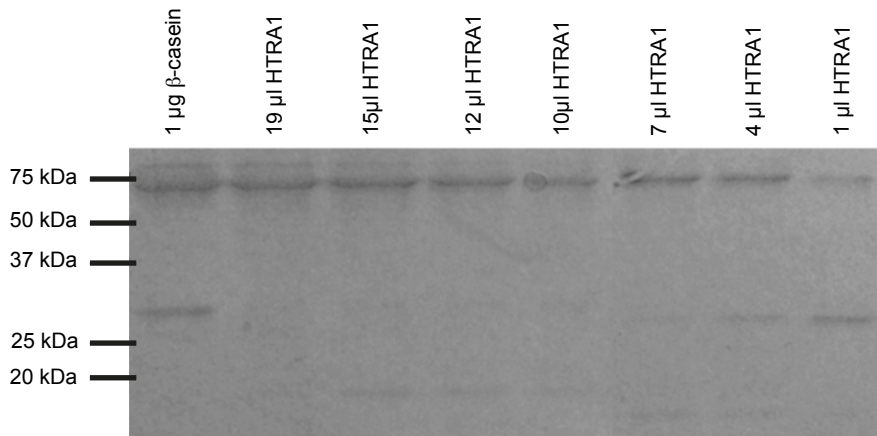

C.

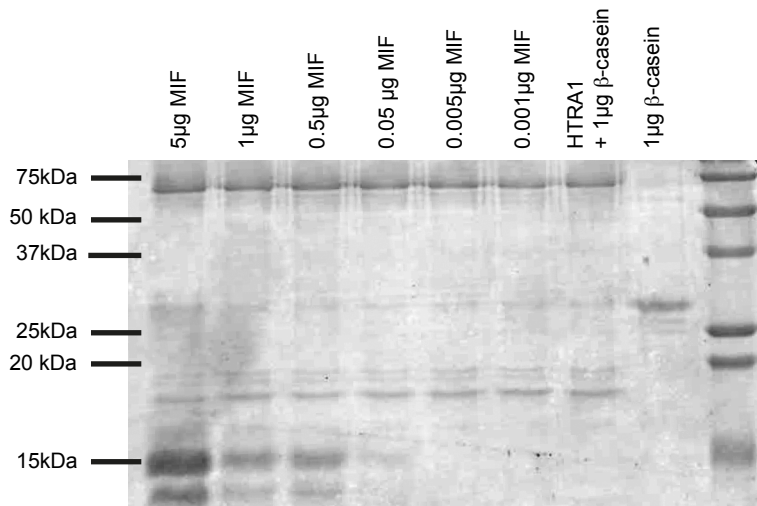

Supplement: 18_2017_2592_MOESM1_ESM.pdf [file 18_2017_2592_MOESM1_ESM.pdf]
